# Supplementary material
Source: PubMed Central journal article supplement (PMC7262649)
Supplement: Supp_TableS1.pdf [file Supp_TableS1.pdf]

## Supplementary Data

SUPPLEMENTARY TABLE S1. AREA UNDER THE CURVE FOR RESTING FOREARM BLOOD FLOW, FREE FATTY ACID, TRIGLYCERIDES, AND INSULIN

| <i>Variable</i>                    | <i>Drug</i>               | <i>Prediabetes Study Subjects n=15</i> |
|------------------------------------|---------------------------|----------------------------------------|
| Resting FBF (mL/min/100 mL tissue) | Exenatide                 | 28.2 ± 2.9                             |
|                                    | Saxagliptin               | 31.3 ± 2.9                             |
|                                    | Placebo                   | 35.7 ± 2.7                             |
|                                    | % change                  | -21.0% ( <i>P</i> =0.131)              |
|                                    | Exenatide vs. placebo     |                                        |
|                                    | % change                  | -12.3% ( <i>P</i> =0.523)              |
|                                    | Saxagliptin vs. placebo   |                                        |
|                                    | % change                  | -9.9% ( <i>P</i> =0.749)               |
| FFA (mmol/L)                       | Exenatide                 | 2.26 ± 0.29                            |
|                                    | Saxagliptin               | 1.62 ± 0.08                            |
|                                    | Placebo                   | 1.67 ± 0.11                            |
|                                    | % change                  | 35.3% ( <i>P</i> =0.053)               |
|                                    | Exenatide vs. placebo     |                                        |
|                                    | % change                  | -3.0% ( <i>P</i> =0.963)               |
|                                    | Saxagliptin vs. placebo   |                                        |
|                                    | % change                  | 39.5% ( <i>P</i> =0.031)               |
| Triglycerides (mg/dL)              | Exenatide                 | 741.17 ± 85.15                         |
|                                    | Saxagliptin               | 1059.64 ± 132.83                       |
|                                    | Placebo                   | 1011.21 ± 132.50                       |
|                                    | % change                  | -26.7% ( <i>P</i> =0.032)              |
|                                    | Exenatide vs. placebo     |                                        |
|                                    | % change                  | 4.8% ( <i>P</i> =0.998)                |
|                                    | Saxagliptin vs. placebo   |                                        |
|                                    | % change                  | 30.1% ( <i>P</i> =0.024)               |
| Insulin (mIU/L)                    | Exenatide                 | 87.50 ± 20.84                          |
|                                    | Saxagliptin               | 212.35 ± 36.50                         |
|                                    | Placebo                   | 322.56 ± 6.02                          |
|                                    | % change                  | -72.9% ( <i>P</i> =0.0006)             |
|                                    | Exenatide vs. placebo     |                                        |
|                                    | % change                  | -34.2% ( <i>P</i> =0.131)              |
|                                    | Saxagliptin vs. placebo   |                                        |
|                                    | % change                  | -58.8% ( <i>P</i> =0.067)              |
|                                    | Exenatide vs. saxagliptin |                                        |

Raw data are mean ± SEM. Differences between groups are expressed in percentages. FBF, forearm blood flow; FFA, free fatty acid; SEM, standard error of mean.
